# Supplementary material
Source: Springer Nature journal article supplement (https://www.springermedizin.de/resource/supplementary/12874_2009_374_MOESM2_ESM.pdf/9434340)
Supplement: MOESM2 [file 9434340]

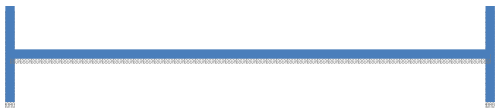

0  
test

2 weeks  
re-test

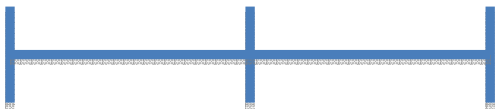

0

1 week

2 weeks wearing the Actigraph

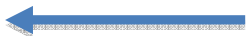

- $\geq 5$  of past 7 days Actigraph analysed
- recall period AQuAA
